# Supplementary material for: Sex-Related Disparities in the Incidence and Outcomes of Community-Acquired Pneumonia among Type 2 Diabetes Patients: A Propensity Score-Matching Analysis Using the Spanish National Hospital Discharge Database for the Period 2016–2019
Source: MDPI journal article supplement (doi:10.3390/jcm10173975), 2021-09-02
Supplement: s1 [file s1]

**Table S1.** ICD-10 codes for diagnosis and therapeutic procedures and pressure ulcers used in this investigation.

| ICD-10 codes                       |                                                                                                                                                             |
|------------------------------------|-------------------------------------------------------------------------------------------------------------------------------------------------------------|
| Community-acquired pneumonia *     | J12 to J18 as primary diagnosis with a POA indicator of "Y".<br>J12 to J18 in any of the secondary diagnosis fields (2-20) and with a POA indicator of "Y". |
| No invasive mechanical ventilation | 5A09357, 5A09457, 5A09557                                                                                                                                   |
| Invasive mechanical ventilation    | 5A1945Z, 5A1955Z, 5A1935Z                                                                                                                                   |
| <i>Aspergillus</i>                 | B44.9                                                                                                                                                       |
| <i>Escherichia coli</i>            | J15.5                                                                                                                                                       |
| <i>Haemophilus influenzae</i>      | J14                                                                                                                                                         |
| <i>Klebsiella pneumoniae</i>       | J15                                                                                                                                                         |
| <i>Legionella</i>                  | A48.1                                                                                                                                                       |
| Non specified <i>Streptococcus</i> | J15.4                                                                                                                                                       |
| Other Gram negative bacteria       | J15.6                                                                                                                                                       |
| <i>Influenza virus</i>             | J09.X1, J10.00 J10.01, J10.08, J11.0, J11.00, J11.08                                                                                                        |
| Other virus                        | J12.XX                                                                                                                                                      |
| <i>Pseudomonas aeruginosa</i>      | J15.1                                                                                                                                                       |
| <i>Staphylococcus aureus</i>       | J15.211 AND J15.212                                                                                                                                         |
| <i>Streptococcus pneumoniae</i>    | J13                                                                                                                                                         |

\*Each discharge diagnosis has a "Present on Admission (POA)" indicator assigned according to the ICD-10-CM Official Guidelines for Coding and Reporting (<https://icdlist.com/icd-10/guidelines/>). The reporting options and definitions for POA are "Y" (present at admission); "N" (not present at admission); "U" (lack documentation to determine presence at admission); "W" (provider is unable to clinically determine if the condition was present); and unreported/not used.

**Table. S2.** Distribution of pneumonia pathogens in patients with and without T2DM hospitalized with community-acquired pneumonia (CAP) in Spain from 2016 to 2019

|                                           |                | 2016       | 2017       | 2018         | 2019         | p-value |
|-------------------------------------------|----------------|------------|------------|--------------|--------------|---------|
| <i>Aspergillus</i> , n(%)                 | <b>T2DM</b>    | 19(0.07)   | 21(0.06)   | 25(0.06)     | 18(0.05)     | 0.751   |
|                                           | <b>No T2DM</b> | 86(0.1)    | 93(0.1)    | 99(0.1)      | 85(0.09)     | 0.656   |
| <i>Escherichia coli</i> , n(%)            | <b>T2DM</b>    | 123(0.42)  | 134(0.39)  | 168(0.43)    | 163(0.43)    | 0.776   |
|                                           | <b>No T2DM</b> | 391(0.46)  | 418(0.46)  | 440(0.43)    | 423(0.42)    | 0.568   |
| <i>Haemophilus influenzae</i> , n(%)      | <b>T2DM</b>    | 186(0.64)  | 255(0.74)  | 328(0.84)    | 285(0.75)    | 0.024   |
|                                           | <b>No T2DM</b> | 644(0.75)  | 736(0.8)   | 897(0.87)    | 964(0.97)    | <0.001  |
| <i>Influenza pneumoniae</i> , n(%)        | <b>T2DM</b>    | 795(2.73)  | 879(2.54)  | 1830(4.7)    | 1633(4.32)   | <0.001  |
|                                           | <b>No T2DM</b> | 3321(3.88) | 2504(2.73) | 5434(5.26)   | 5074(5.1)    | <0.001  |
| <i>Klebsiella pneumoniae</i> , n(%)       | <b>T2DM</b>    | 150(0.51)  | 159(0.46)  | 203(0.52)    | 196(0.52)    | 0.615   |
|                                           | <b>No T2DM</b> | 377(0.44)  | 474(0.52)  | 482(0.47)    | 545(0.55)    | 0.004   |
| <i>Legionella</i> , n(%)                  | <b>T2DM</b>    | 12(0.04)   | 20(0.06)   | 29(0.07)     | 22(0.06)     | 0.368   |
|                                           | <b>No T2DM</b> | 47(0.05)   | 58(0.06)   | 90(0.09)     | 65(0.07)     | 0.044   |
| Non specified <i>Streptococcus</i> , n(%) | <b>T2DM</b>    | 66(0.23)   | 77(0.22)   | 78(0.2)      | 105(0.28)    | 0.151   |
|                                           | <b>No T2DM</b> | 224(0.26)  | 245(0.27)  | 327(0.32)    | 299(0.3)     | 0.073   |
| Other Gram-negative bacteria, n(%)        | <b>T2DM</b>    | 152(0.52)  | 190(0.55)  | 187(0.48)    | 250(0.66)    | 0.006   |
|                                           | <b>No T2DM</b> | 528(0.62)  | 550(0.6)   | 580(0.56)    | 617(0.62)    | 0.309   |
| Other virus, n (%)                        | <b>T2DM</b>    | 175(0.6)   | 220(0.64)  | 311(0.8)     | 425(1.13)    | <0.001  |
|                                           | <b>No T2DM</b> | 696(0.81)  | 674(0.73)  | 1061(1.03)   | 1185(1.19)   | <0.001  |
| <i>Pseudomonas aeruginosa</i> , n(%)      | <b>T2DM</b>    | 309(1.06)  | 294(0.85)  | 339(0.87)    | 362(0.96)    | 0.022   |
|                                           | <b>No T2DM</b> | 960(1.12)  | 1022(1.11) | 1105(1.07)   | 1083(1.09)   | 0.690   |
| <i>Staphylococcus aureus</i> , n(%)       | <b>T2DM</b>    | 230(0.79)  | 299(0.87)  | 370(0.95)    | 342(0.91)    | 0.154   |
|                                           | <b>No T2DM</b> | 725(0.85)  | 724(0.79)  | 870(0.84)    | 904(0.91)    | 0.044   |
| <i>Streptococcus pneumoniae</i> , n(%)    | <b>T2DM</b>    | 1915(6.57) | 2542(7.35) | 3396(8.72)   | 3851(10.2)   | <0.001  |
|                                           | <b>No T2DM</b> | 6584(7.69) | 8008(8.72) | 10724(10.38) | 11402(11.45) | <0.001  |

T2DM: Type 2 diabetes mellitus;

**Table. S3.** Distribution of pneumonia pathogens in women and men with T2DM hospitalized with community-acquired pneumonia (CAP), in Spain (2016-2019), before and after propensity score matching.

|                                           | Before PSM |            |         | After PSM  |            |         |
|-------------------------------------------|------------|------------|---------|------------|------------|---------|
|                                           | T2DM Men   | T2DM Women | p-value | T2DM Men   | T2DM Women | p-value |
| <i>Aspergillus</i> , n(%)                 | 57(0.07)   | 26(0.05)   | 0.203   | 24(0.04)   | 26(0.05)   | 0.777   |
| <i>Escherichia coli</i> , n(%)            | 430(0.49)  | 158(0.3)   | <0.001  | 218(0.41)  | 158(0.3)   | 0.002   |
| <i>Haemophilus influenzae</i> , n(%)      | 719(0.83)  | 335(0.63)  | <0.001  | 361(0.67)  | 335(0.63)  | 0.323   |
| <i>Influenza pneumoniae</i> , n(%)        | 2948(3.39) | 2189(4.09) | <0.001  | 1901(3.55) | 2189(4.09) | <0.001  |
| <i>Klebsiella pneumoniae</i> , n(%)       | 509(0.59)  | 199(0.37)  | <0.001  | 261(0.49)  | 199(0.37)  | 0.004   |
| <i>Legionella</i> , n(%)                  | 65(0.07)   | 18(0.03)   | 0.002   | 45(0.08)   | 18(0.03)   | 0.001   |
| Non specified <i>Streptococcus</i> , n(%) | 247(0.28)  | 79(0.15)   | <0.001  | 140(0.26)  | 79(0.15)   | <0.001  |
| Other Gram-negative bacteria, n(%)        | 589(0.68)  | 190(0.36)  | <0.001  | 286(0.53)  | 190(0.36)  | <0.001  |
| Other virus, n(%)                         | 609(0.7)   | 522(0.98)  | <0.001  | 374(0.7)   | 522(0.98)  | <0.001  |
| <i>Pseudomonas aeruginosa</i> , n(%)      | 959(1.1)   | 345(0.64)  | <0.001  | 414(0.77)  | 345(0.64)  | 0.012   |
| <i>Staphylococcus aureus</i> , n(%)       | 856(0.98)  | 385(0.72)  | <0.001  | 478(0.89)  | 385(0.72)  | 0.001   |
| <i>Streptococcus pneumoniae</i> , n(%)    | 7311(8.41) | 4393(8.21) | 0.183   | 4466(8.35) | 4393(8.21) | 0.418   |

**Table S4.** Univariable analysis of factors associated with in-hospital mortality during admissions for community-acquired pneumonia (CAP), among T2DM patients according to sex.

|                                      | <b>MEN</b>        | <b>WOMEN</b>      | <b>BOTH</b>       |
|--------------------------------------|-------------------|-------------------|-------------------|
| Variables                            | <b>OR (95%CI)</b> | <b>OR (95%CI)</b> | <b>OR (95%CI)</b> |
| 18-49 years                          | 1                 | 1                 | 1                 |
| 50-64 years                          | 1.82(1.40-2.25)   | 1.49(1.08-2.12)   | 1.60(1.12-2.31)   |
| 65-79 years                          | 2.97(2.33-3.59)   | 3.03(2.14-4.43)   | 3.14(2.19-4.34)   |
| ≥ 80 years                           | 5.54(4.25-7.12)   | 7.28(5.71-9.34)   | 6.89(4.76-9.05)   |
| Myocardial infarction                | 1.23(1.11-1.37)   | 1.59(1.42-1.78)   | 1.47 (1.29-1.56)  |
| Congestive heart failure             | 1.42(1.36-1.55)   | 1.60(1.51-1.70)   | 1.53 (1.32-1.61)  |
| Peripheral vascular disease          | 1.20(1.06-1.37)   | 1.37(1.21-1.54)   | 1.29(1.18-1.42)   |
| Cerebrovascular disease              | 1.58(1.47-1.70)   | 1.69(1.51-1.89)   | 1.63(1.51-1.76)   |
| Dementia                             | 2.18(2.07-2.20)   | 1.97(1.82-2.14)   | 1.97(1.80-2.15)   |
| COPD                                 | 0.91(0.84-0.98)   | 0.88(0.82-0.96)   | 0.83(0.78-0.89)   |
| Rheumatoid disease                   | 1.17(1.01-1.35)   | 1.10(0.94-1.28)   | 1.12(0.97-1.26)   |
| Peptic ulcer                         | 0.88(0.75-1.03)   | 1.02(0.84-1.23)   | 0.97(0.81-1.15)   |
| Mild liver disease                   | 0.91(0.86-0.99)   | 0.83(0.74-0.93)   | 0.90(0.79-1.01)   |
| Hemiplegia or paraplegia             | 2.37(1.92-2.83)   | 2.51(1.95-3.27)   | 2.39(2.01-2.80)   |
| Renal disease                        | 1.26(1.20-1.32)   | 1.56(1.47-1.66)   | 1.37(1.30-1.45)   |
| Cancer                               | 2.16(2.01-2.34)   | 1.99(1.83-2.16)   | 2.05(1.90-2.22)   |
| Moderate/severe liver disease,       | 3.46(3.01-3.99)   | 2.88(2.35-3.43)   | 3.04 (2.63-3.46)  |
| Metastatic cancer                    | 6.37(5.87-6.88)   | 5.89(5.12-6.79)   | 6.12(5.69-6.57)   |
| AIDS                                 | 2.02(0.97-3.08)   | 1.25(0.79-1.77)   | 1.80(0.72-2.89)   |
| Non-Invasive Mechanical ventilation, | 3.33(3.01-3.65)   | 2.84(2.49-3.27)   | 3.23(2.98-3.50)   |
| Invasive Mechanical ventilation      | 11.12(8.99-13.34) | 9.16(8.03-10.19)  | 10.11(9.23-12.17) |
| 2017                                 | 0.93(0.86-0.99)   | 0.92(0.85-0.99)   | 0.90(0.84-0.98)   |
| 2018                                 | 0.90(0.84-0.97)   | 0.84(0.79-0.91)   | 0.85(0.80-0.91)   |
| 2019                                 | 0.87(0.81-0.94)   | 0.80(0.72-0.89)   | 0.82(0.75-0.90)   |
| Male sex                             |                   |                   | 1.12 (1.07-1.17)  |

OR: Odds Ratios. T2DM: Type 2 diabetes mellitus; COPD: chronic obstructive pulmonary disease;

AIDS: acquired immune deficiency syndrome
